# Supplementary figures and images for: A mesenchymal glioma stem cell profile is related to clinical outcome
Source: PubMed Central journal article supplement — Oncogenesis. 2014 Mar 17;3(3):e91–. doi: 10.1038/oncsis.2014.5 (PMC4038390; doi:10.1038/oncsis.2014.5), 2014-03-17

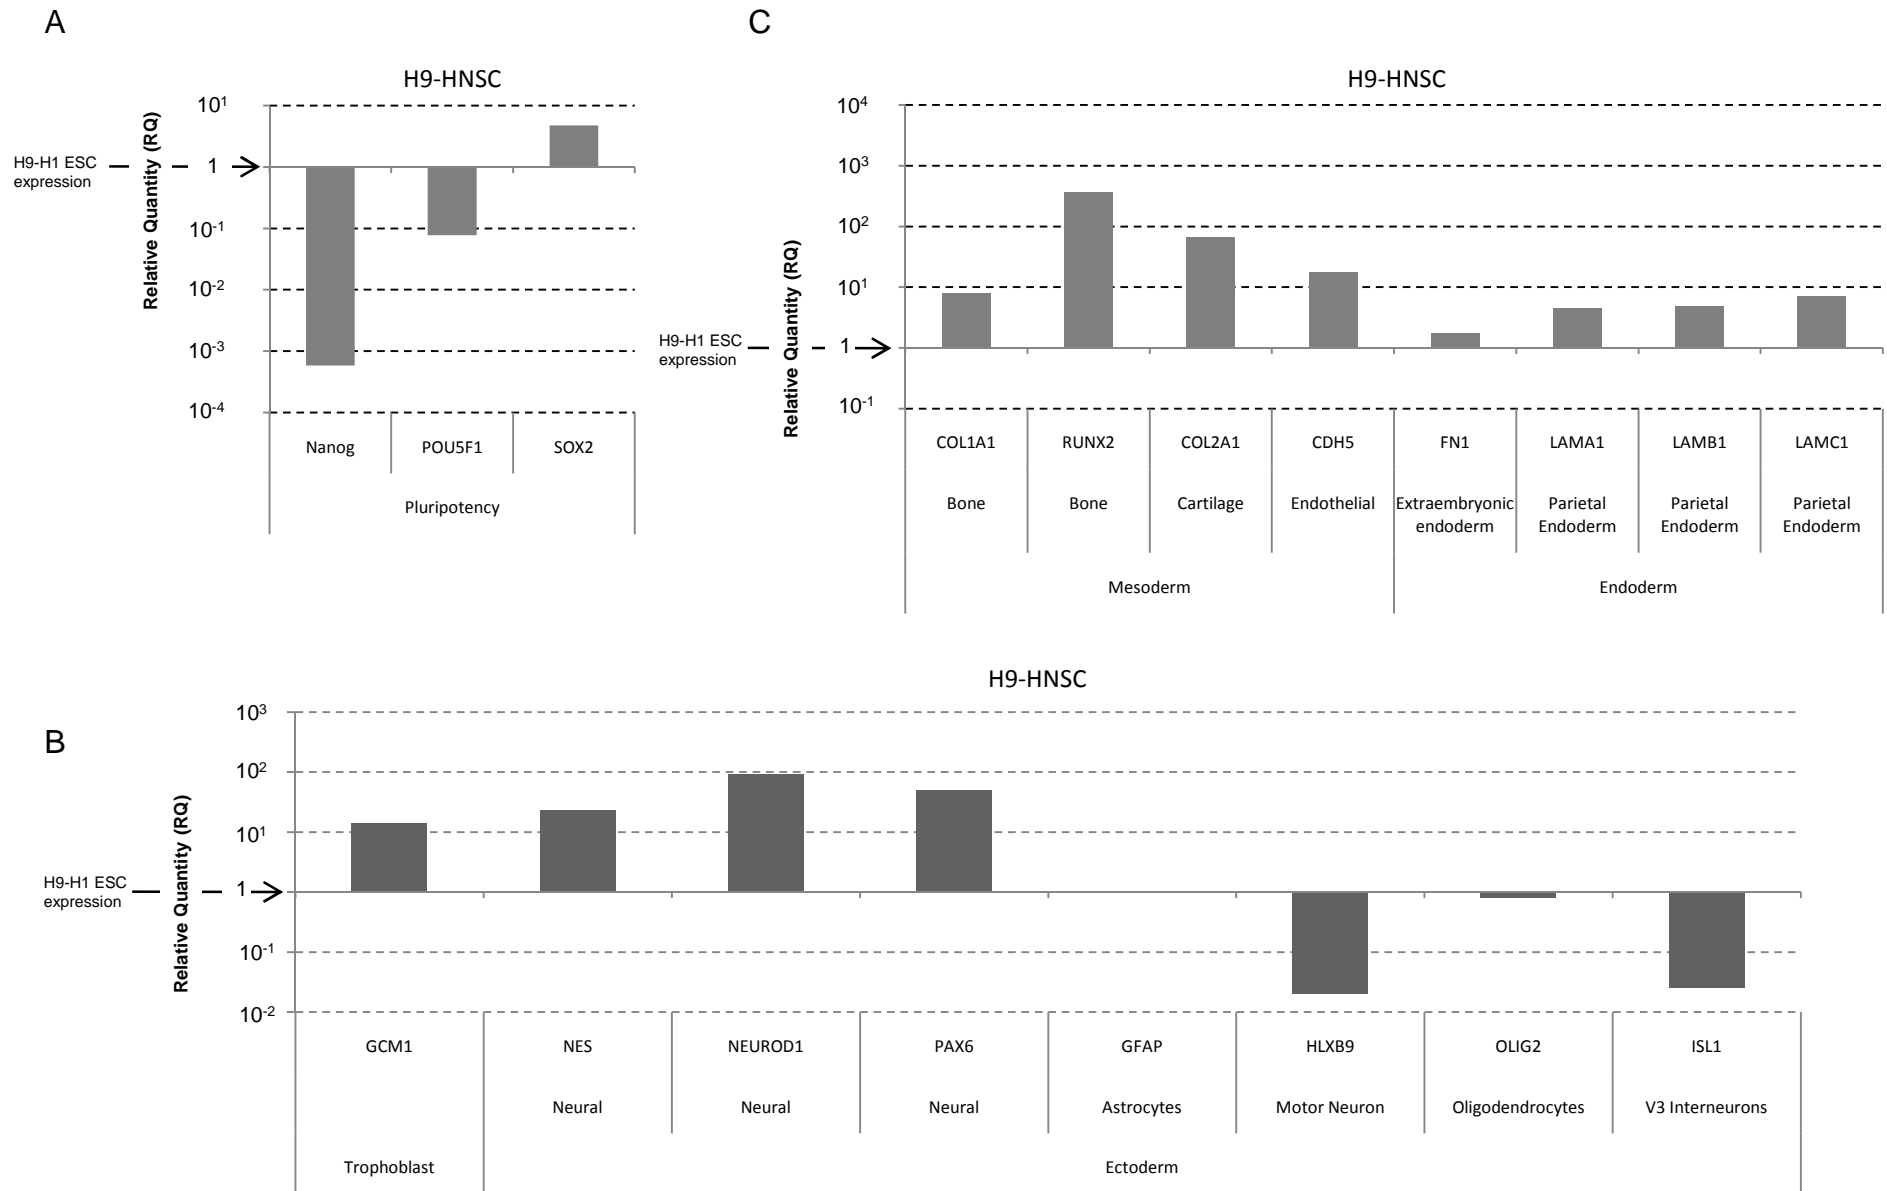

**Supplementary Figure 1**

Supplement: oncsis20145x1.pdf [file oncsis20145x1.pdf]

### SFRP2

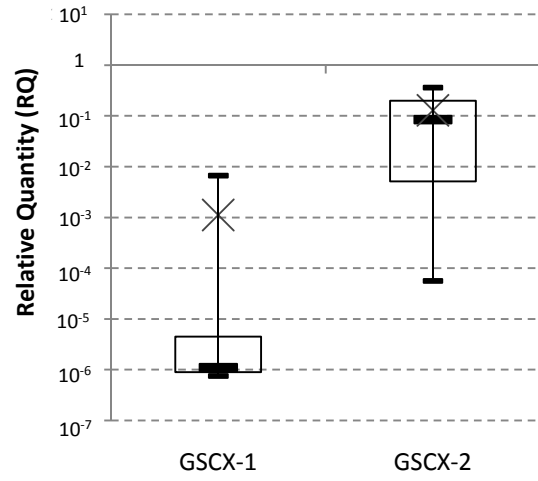

### FN1

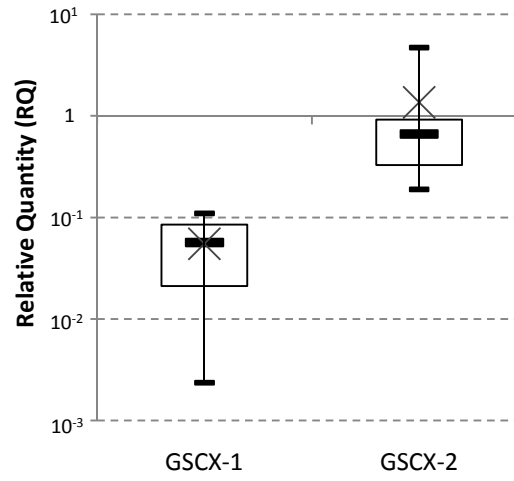

### SST

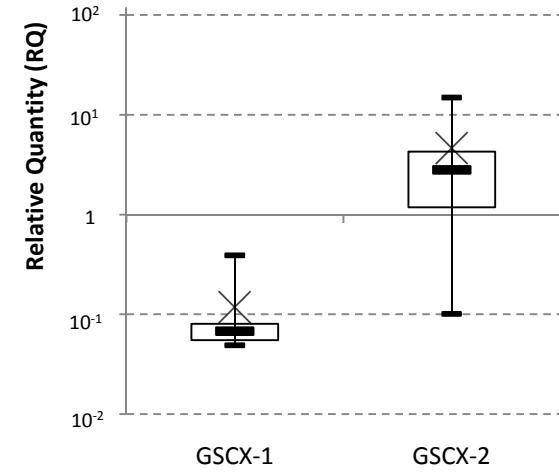

### FOXA2

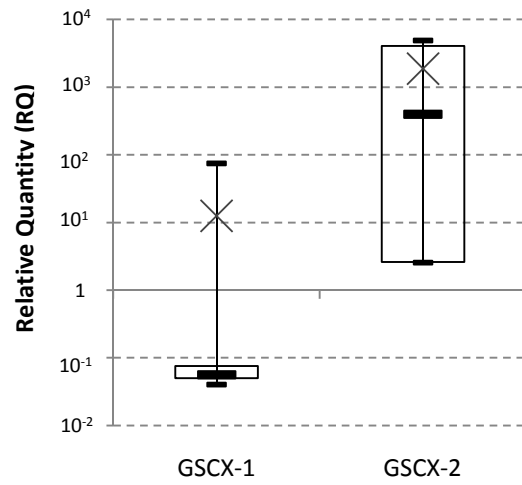

### GAL

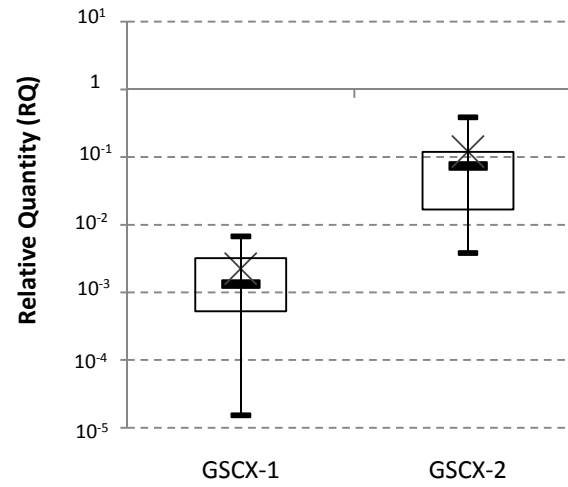

Supplement: oncsis20145x2.pdf [file oncsis20145x2.pdf]
